# Supplementary material for: Loss of focal adhesions in glia disrupts both glial and photoreceptor axon migration in the Drosophila visual system
Source: Oxford University Press journal article supplement (doi:10.1242/dev.101972), 2014-07-22

## Supplemental Data

### Supplemental Figure Legends

#### **Figure S1 (related to Figure 1): Focal adhesion complexes in the wandering 3<sup>rd</sup> instar ED and OS.**

Labeling of the focal adhesion complex components in the wandering 3<sup>rd</sup> instar (wL3) eye disc and OS. All glial membranes were labeled using *repo-GAL4>CD8::GFP* (A,B: green); *repo-GAL4>CD8::RFP* (E,F: blue). Neurons were immunolabeled using anti-HRP (A,B: blue) and nuclei using DAPI (C,D: blue).  $\beta$ PS integrin was detected through immunolabeling (A-I; red) and the alpha integrin subunits were labeled using  $\alpha$ PS2 endogenously tagged with YFP ( $\alpha$ PS2::YFP, C,D: green) and immunolabeling for  $\alpha$ PS3 (H,I: blue). Other focal adhesion components were labeled using Talin and Integrin linked kinase (ILK) endogenously tagged with GFP (Talin::GFP, E-G: green)(ILK::GFP, H,I: green).

All panels are single 0.2  $\mu$ m Z-sections and for all panels single Z sections at the basal side (basal) and through the mid point (mid) are shown. Dashed lines show where the cross sections (B, D, G, I) are obtained. White boxed regions were shown in higher magnification in small panels (F). In all tissues, focal adhesion complexes including integrins, Talin and ILK were seen throughout the OS and ED. Note that the complexes were strongly detected at the basal level of the OS where glia contact the neural lamella. Scale bars are 10  $\mu$ m.

#### **Figure S2 (related to Figure 2): Knock down of integrin and OS morphological changes in the early 3<sup>rd</sup> instar.**

*repo-GAL4* was used to express  $\beta$ PS-RNAi and talin-RNAi in all glia. *UAS-CD8::GFP* (green) labeled glial membranes and DAPI (blue, A-C) marked nuclei. Images were projections of 0.2  $\mu$ m Z-stacks. In controls (A and D),  $\beta$ PS (red) and  $\alpha$ PS3 (blue, D) immunolabeling was detected as puncta in the eye disc and OS. These puncta were absent in  $\beta$ PS-RNAi treated OS (B) and decreased in talin-RNAi OS (C and E) (arrows), but still present in the eye disc epithelia (double arrows). Similarly immunolabeling for Talin was observed in puncta (F, red) throughout the wild-type OS labeled with *NrxIV::GFP* (green) and was reduced in the OS (G, arrow) of Talin-RNAi but retained in the ED (G, double arrow) and the photoreceptor axons. Note that the PG were concentrated in the anterior half (close to ED) and reduced in the posterior half (arrowheads) of RNAi OS. Scale bars are 5 microns (A-F) and 10 microns (G).

#### **Figure S3 (related to Figure 3): Dye penetration after $\beta$ PS, talin and NrxIV knockdown in OS and peripheral nerves.**

Dye permeability assays were conducted to determine the degree of blood-nerve-barrier disruption with loss of integrin and talin in the glia. In control animals, Alexa-647 conjugated dextran was excluded from the interior of the peripheral nerve (A) and the OS (E). The penetration of the fluorescent dye significantly increased in the peripheral nerve (B-D) and OS (F-H) when *NrxIV-RNAi* (positive control),  $\beta$ PS-RNAi or talin-RNAi were expressed in either the subperineurial (*SGP-GAL4*) or all glia (*repo-GAL4*). The quantification of the dye penetration into the OS for  $\beta$ PS-, talin- and *NrxIV-RNAi* is

shown in Figure 3.

**Figure S4 (related to Figure 4): Photoreceptor axon targeting defects in RNAi adults.**

A monoclonal 24B10 antibody was used to label photoreceptor axon in adult fly eye-brain complexes. In controls (A), 24B10 labeled photoreceptor axons terminated properly in the optic lobe (OL). Note that left panel shows axonal termination in both lamina (La) and medulla (Me) layers and only medulla was preserved in the right panel. In RNAi flies (B,C), different neuronal defects were observed, which included disorganized axons termination (arrowheads) and lack of photoreceptor innervation (B, C) in the optic lobe. Smaller optic lobes were seen associated with the abbreviated axonal termination. Dashed lines show the boundary between the optic lobe and midbrain (MB).

**Figure S5 (related to Figure 5): Axon stalling phenotypes**

Examples of axonal stalling and associated glia in the OS (C-E) or ED (A,B,B'). The stalling region was shown by single optic sections either from the middle of the Z-stack (mid) or from the basal level (basal). Regions in white boxes are digitally magnified and displayed in the right panels. Arrows point to the glia associated with the stalled axon terminals.

C-E) Partial stalling phenotypes were observed (C,D) and these represented relatively rare cases where only subsets of photoreceptor axons (arrows) were stalled in the RNAi OS while others migrated through. E) An example of axonal stalling (arrow) at the boundary of the ED and OS.

All panels are single 0.2  $\mu\text{m}$  Z-sections. Scale bars are 10  $\mu\text{m}$ .

Figure S1 A

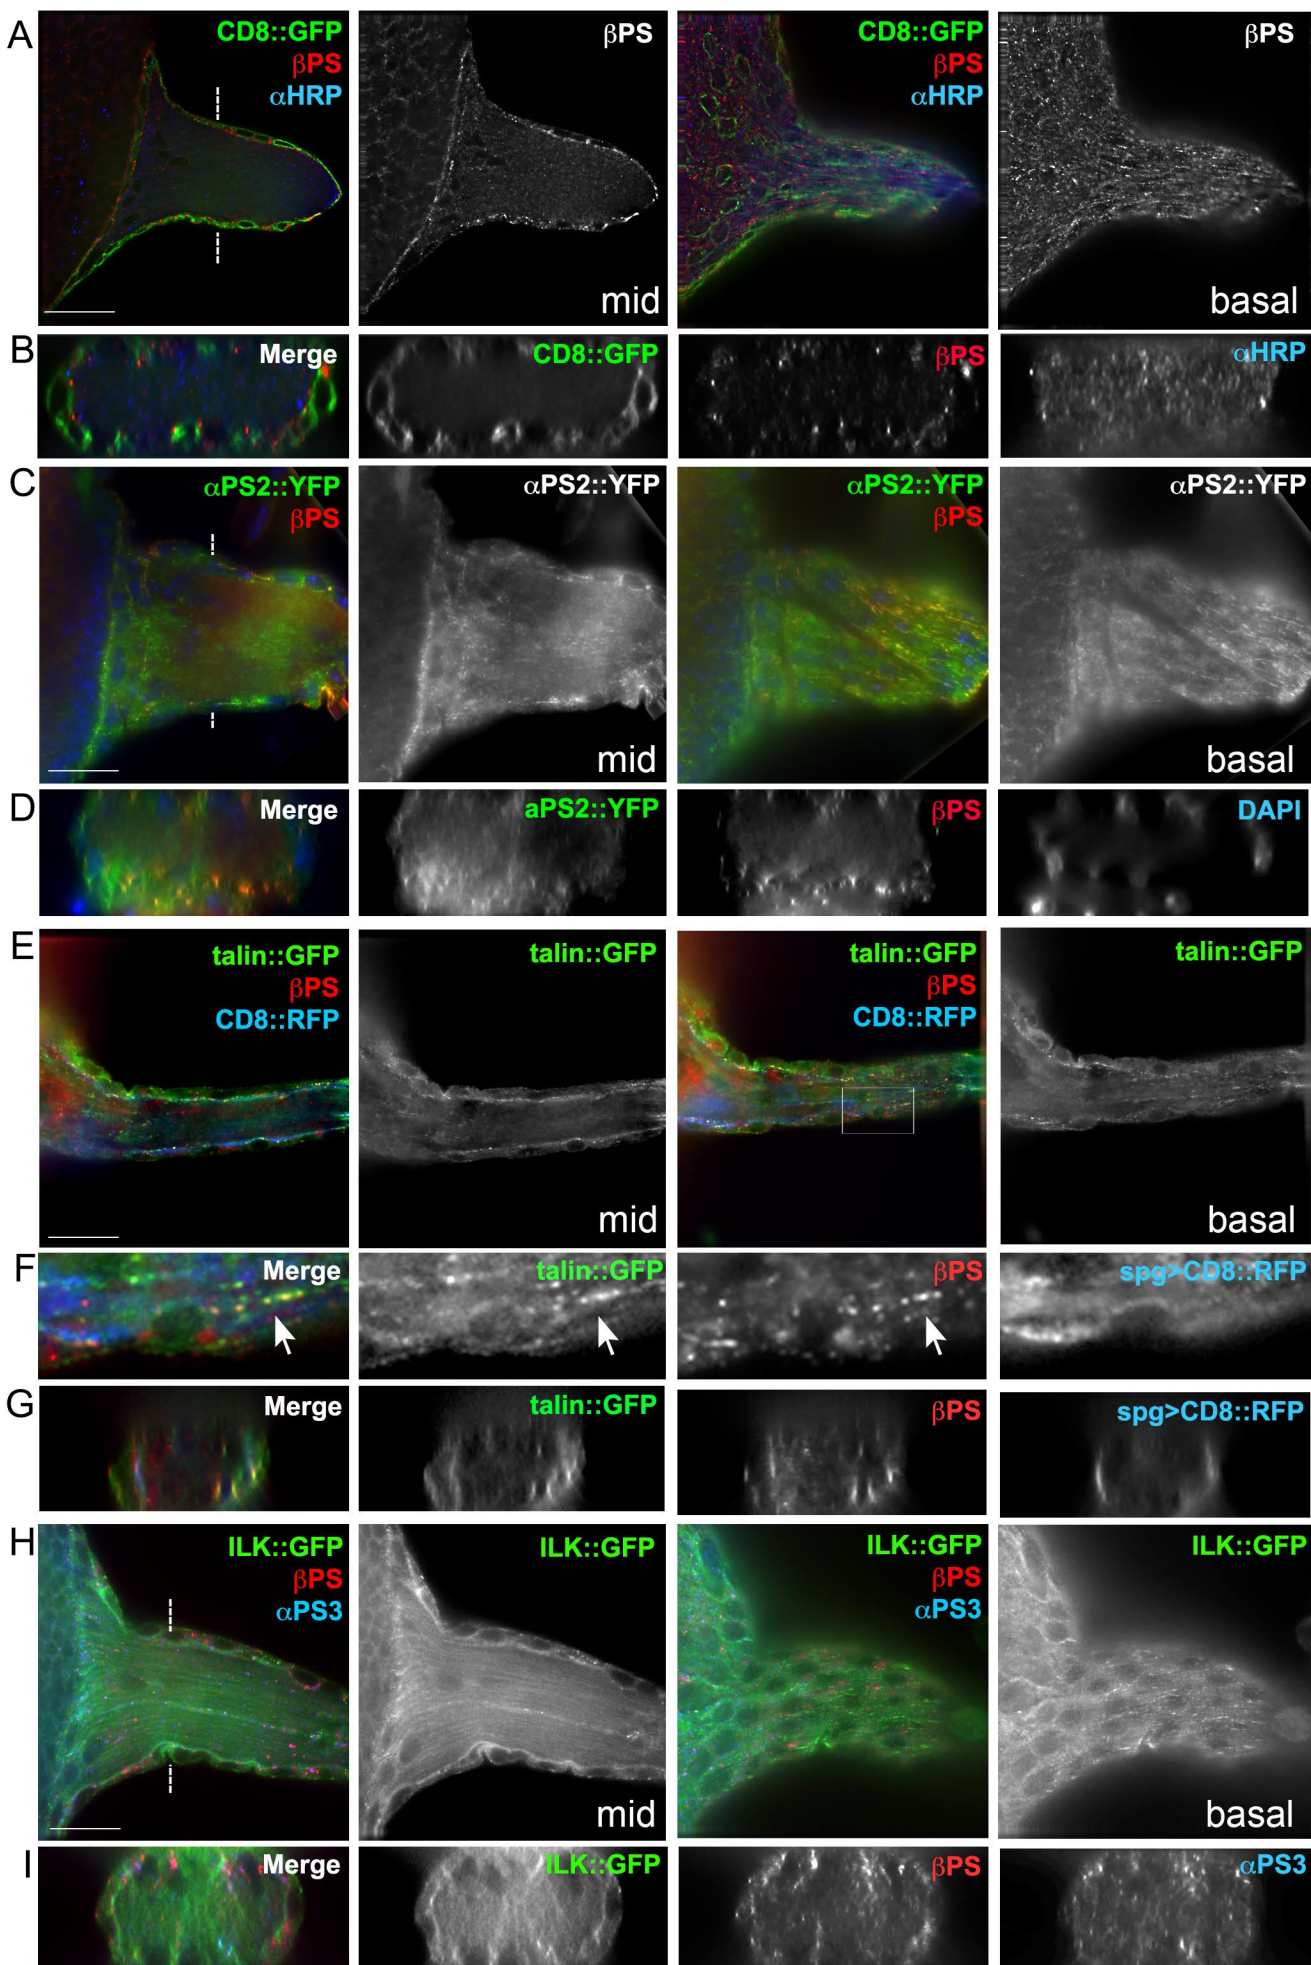



Figure S2

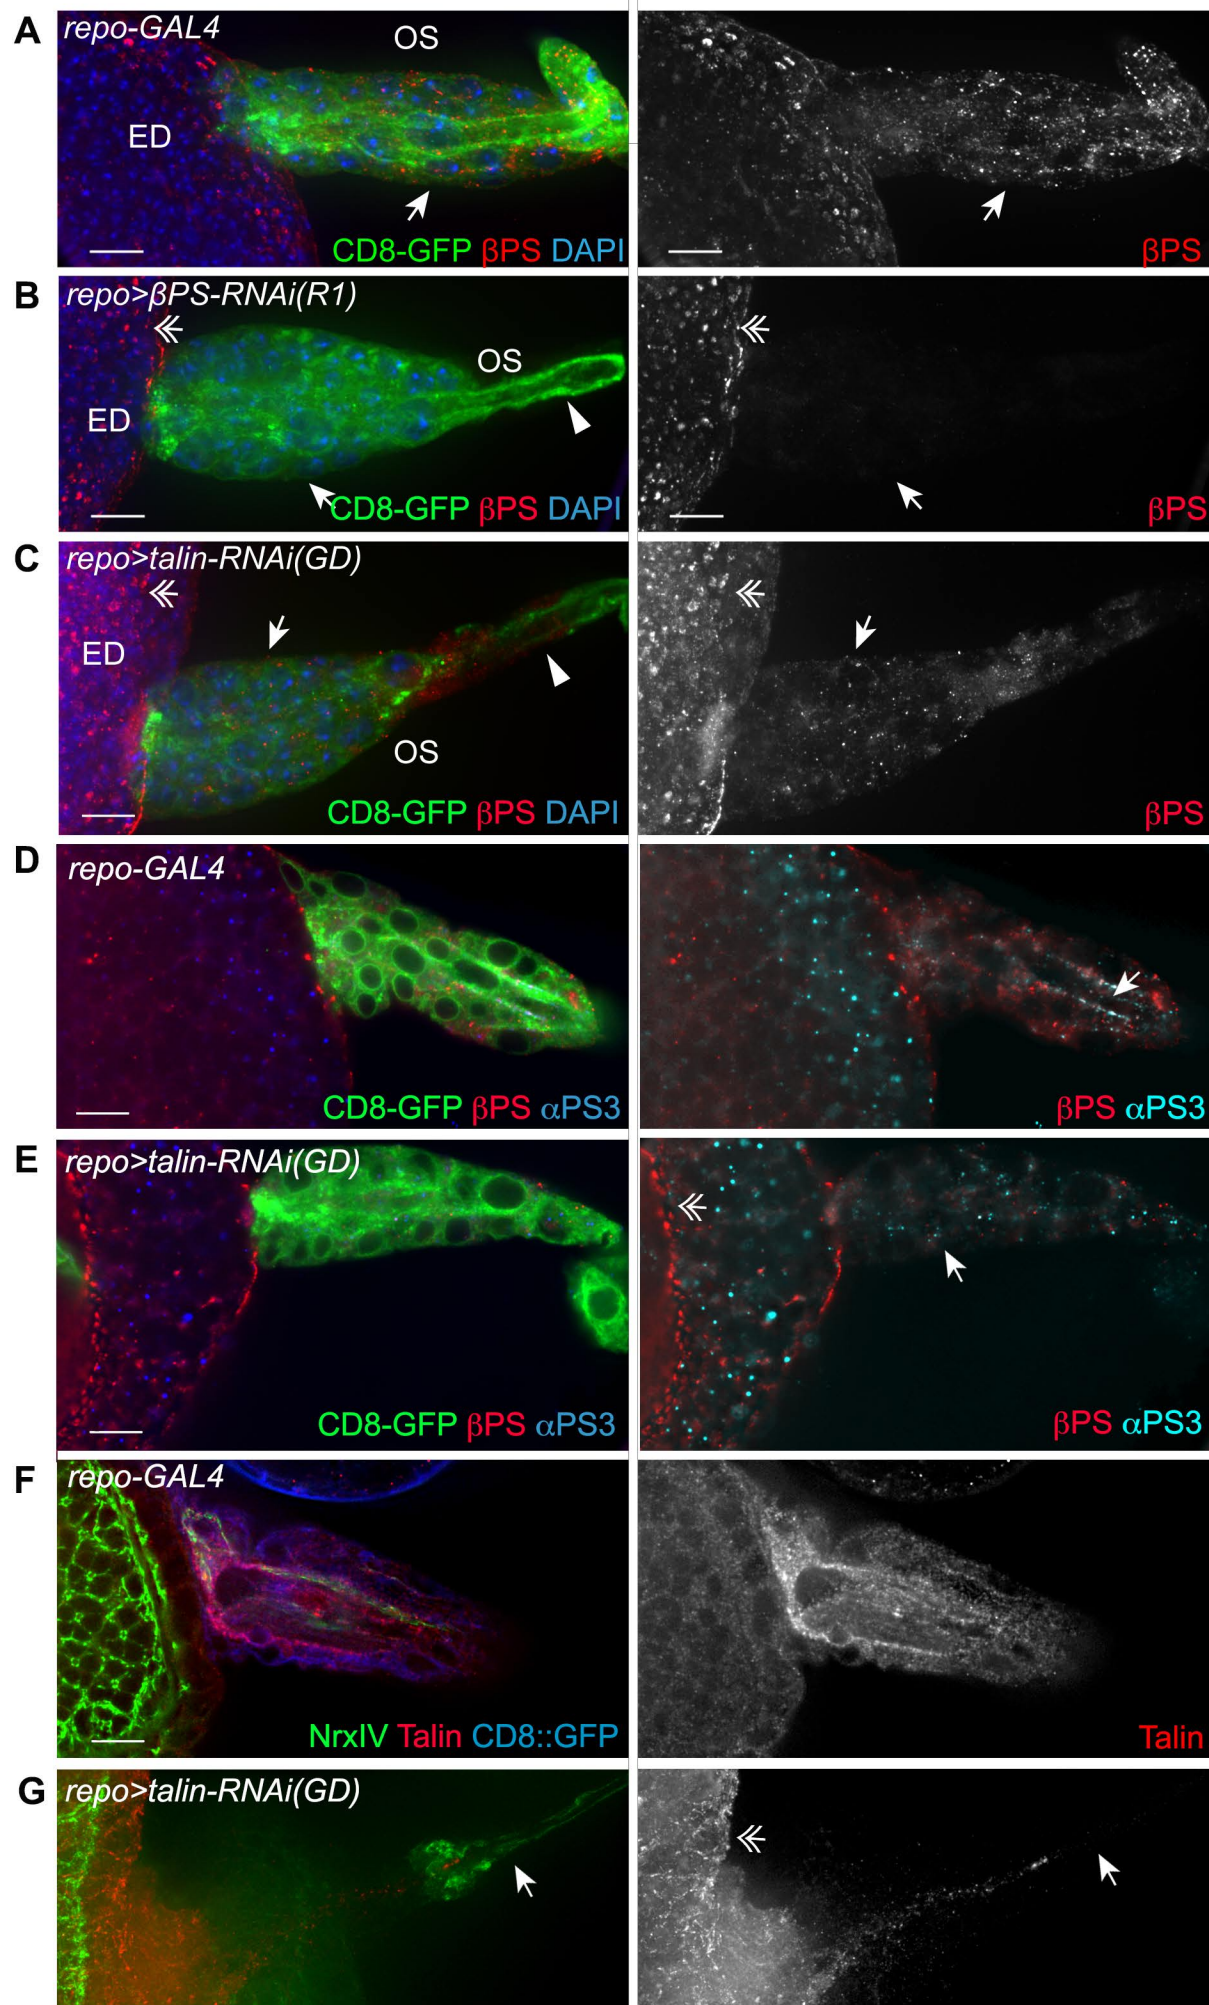



Figure S3

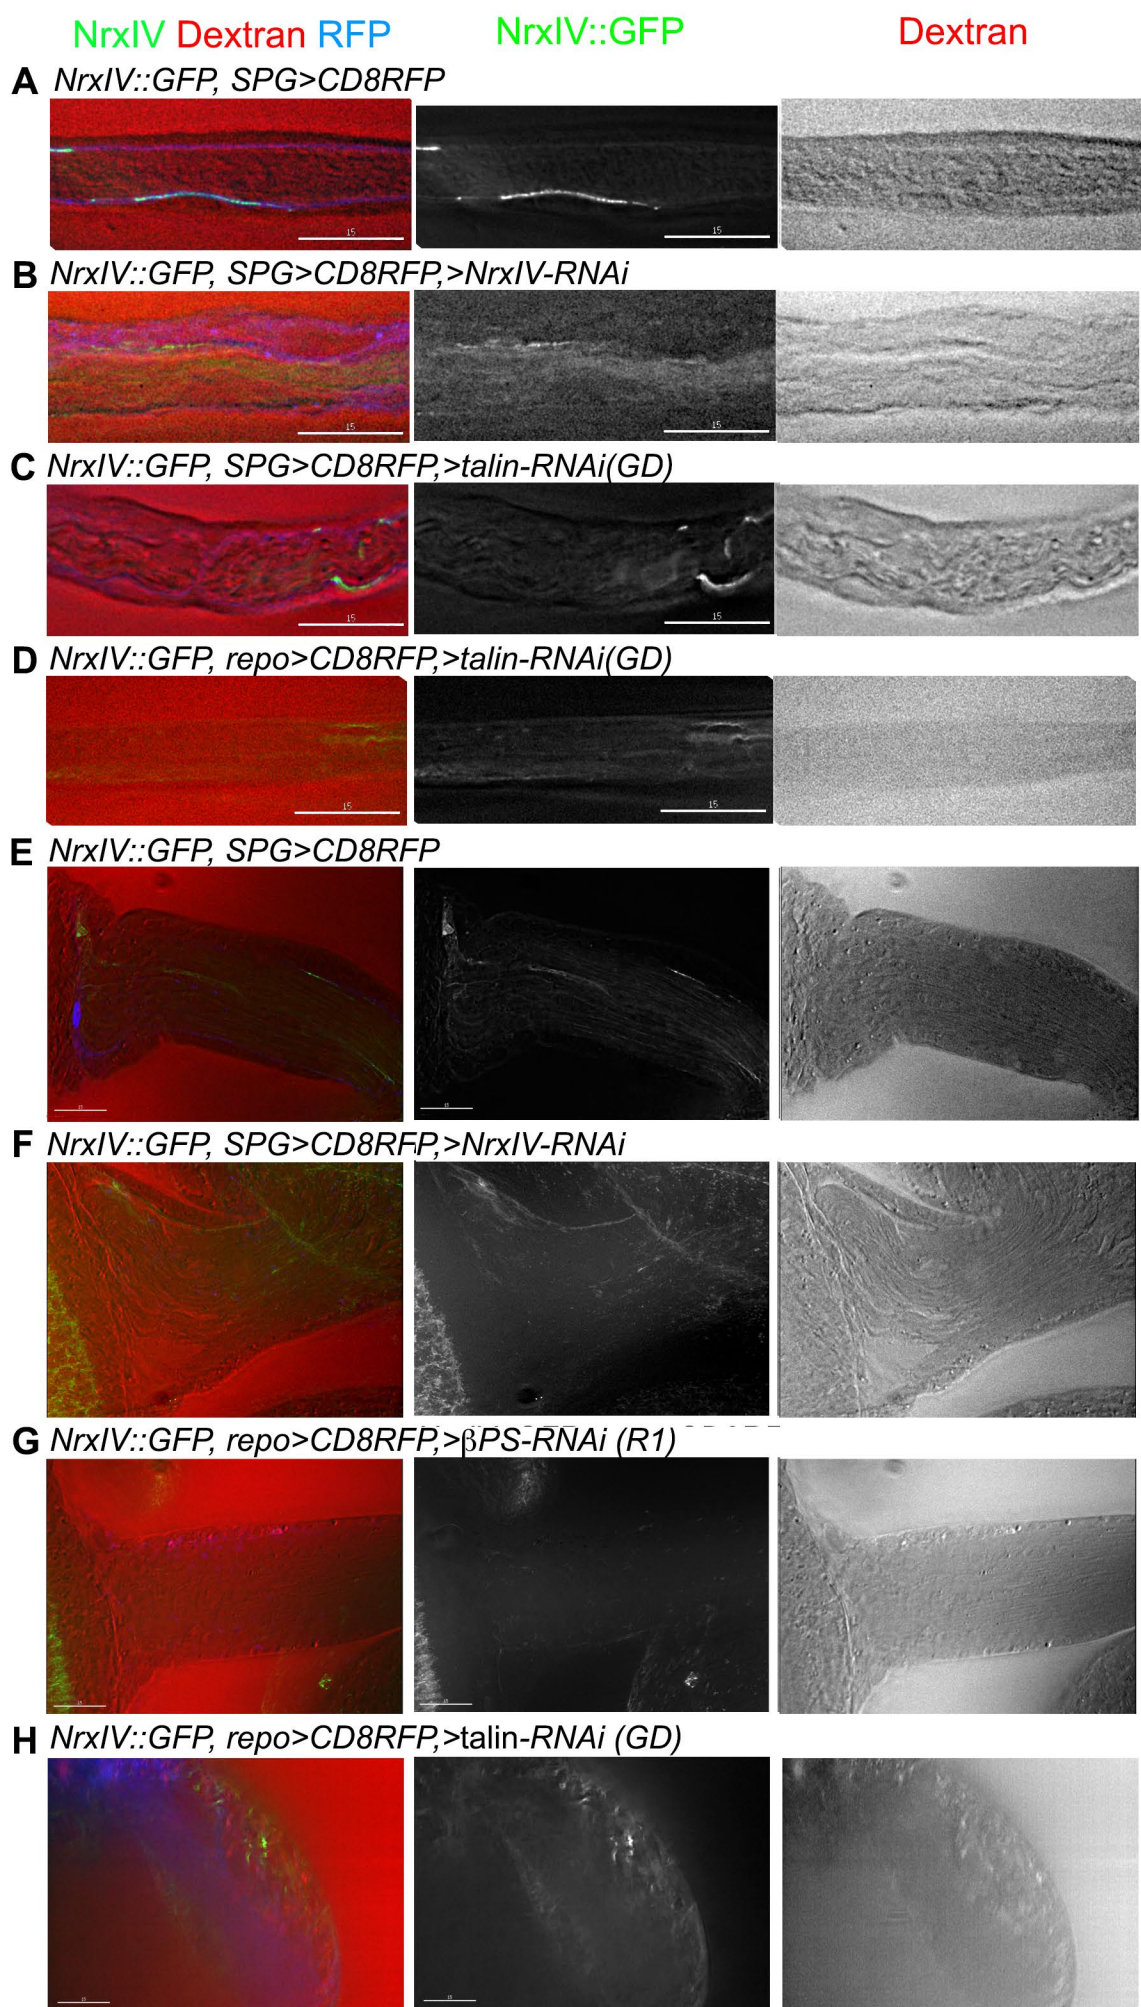

Figure S4

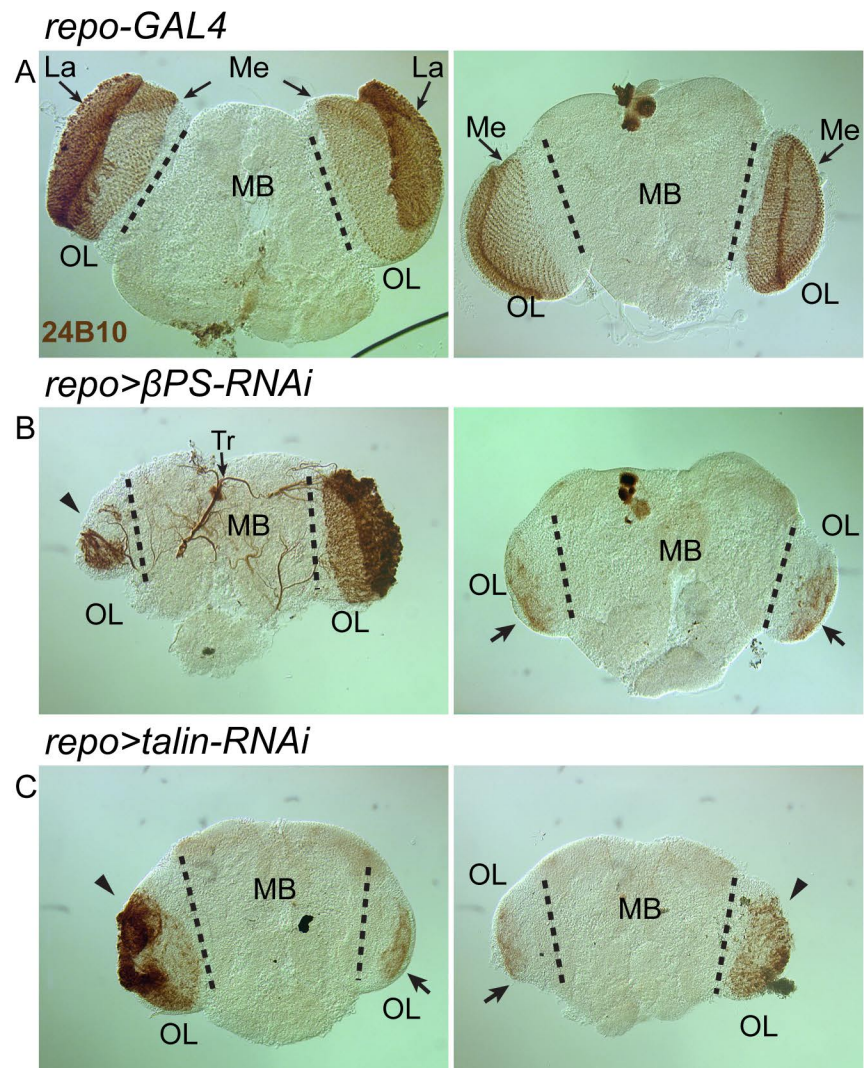



Figure S5

*repo>CD8::GFP> $\beta$ PS-RNAi (R1)*

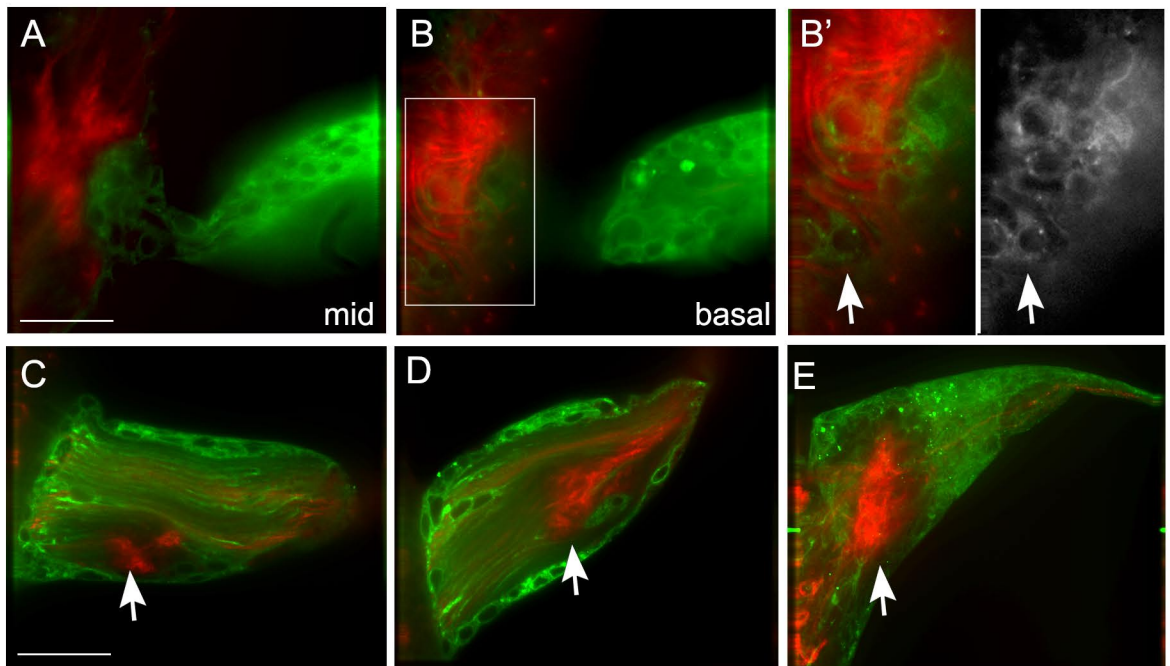

Supplement: dev101972_supp.pdf [file dev101972_supp.pdf]
